# Supplementary material for: Self-Reported Long COVID and Its Association with the Presence of SARS-CoV-2 Antibodies in a Danish Cohort up to 12 Months after Infection
Source: PubMed Central journal article supplement (PMC9769646; doi:10.1128/spectrum.02537-22), 2022-11-09

Supplementary figure 1: Serostatus and time since COVID-19 (boxplot)

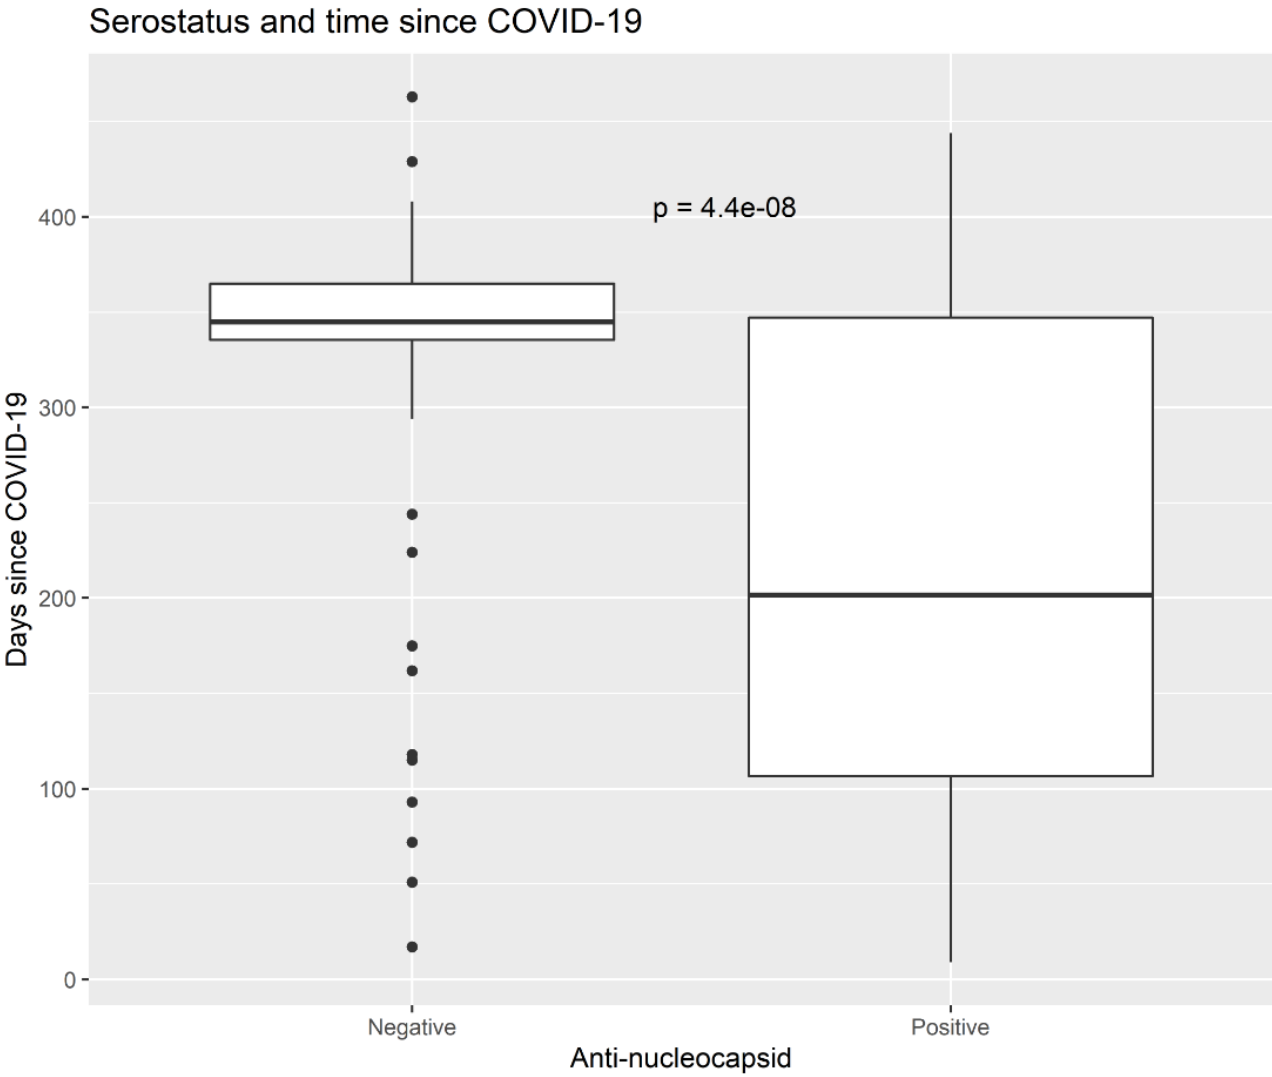

Supplement: spectrum.02537-22-s0001.pdf [file spectrum.02537-22-s0001.pdf]
